# Supplementary material for: Electro-optic crystals grown in confined geometry with optimal crystal characteristics for THz photonic applications
Source: Royal Society of Chemistry journal article supplement (doi:10.1039/c6ce00958a), 2016-01-01
Supplement: c6ce00958a1.pdf [file c6ce00958a1.pdf]

## Electronic Supplementary Information (ESI)

for

# **Electro-Optic Crystals Grown in Confined Geometry with Optimal Crystal Characteristics for THz Photonic Applications<sup>†</sup>**

Seung-Heon Lee,<sup>a</sup> Seung-Jun Lee,<sup>a</sup> Mojca Jazbinsek,<sup>\*,b</sup> Bong Joo Kang,<sup>c</sup> Fabian Rotermund,<sup>c</sup> O-Pil Kwon<sup>\*,a</sup>

<sup>a</sup> Department of Molecular Science and Technology, Ajou University, Suwon 443-749, Korea.  
opilkwon@ajou.ac.kr

<sup>b</sup> Institute of Computational Physics, Zurich University of Applied Sciences (ZHAW), 8401 Winterthur, Switzerland. mojca.jazbinsek@zhaw.ch

<sup>c</sup> Department of Physics & Department of Energy Systems Research, Ajou University, Suwon 443-749, Korea.

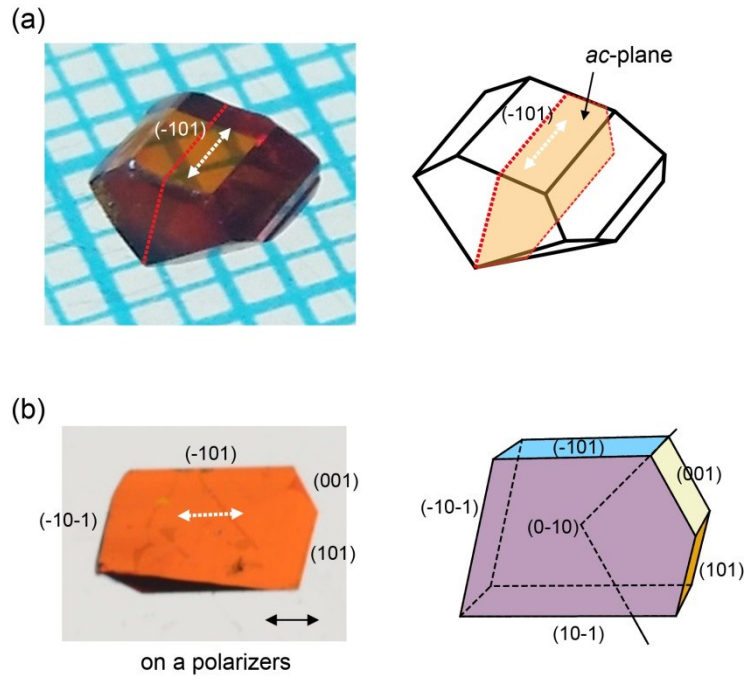

**Fig. S1** (a) Photograph of HMQ-TMS crystal grown by conventional slow cooling method in methanol, which exhibit hexagonally-shaped block morphology. (b) Photograph of *ac*-plane-cut HMQ-TMS crystal prepared by cutting a bulk single crystal with its facet diagram. The dotted and the solid double arrows are parallel to the polar axis of HMQ-TMS crystals and to the light-polarization direction after the polarizer, respectively.

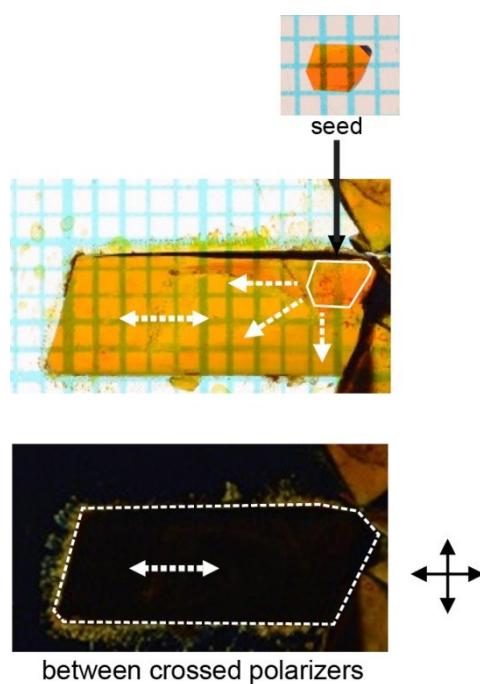

**Fig. S2** Photographs of HMQ-TMS crystals grown in 0.5 mm-gap confined geometry, in which 0.39 mm-thick HMQ-TMS seed with an area of 3.0 mm<sup>2</sup> grows to crystal with a larger area of 57.0 mm<sup>2</sup>. The dotted arrows present main crystals growth directions. The dotted and the solid double arrows are parallel to the polar axis of HMQ-TMS crystals and to the polarizer directions, respectively.

## **X-ray diffraction reflection patterns of HMQ-TMS crystals**

Fig. 4b shows X-ray diffraction reflection patterns of HMQ-TMS crystals grown in confined geometry. In high diffraction angle region ( $2\theta \approx 44-45^\circ$ ), a small broad peak appears. In this diffraction angle region ( $2\theta \approx 44-45^\circ$ ), various diffraction peak can be appear;  $2\theta = 44.038$  degree corresponding to (331) plane,  $44.216$  degree corresponding to (-226) plane,  $44.572$  degree corresponding to (-5-14) plane,  $44.673$  degree corresponding to (501) plane and  $44.888$  degree corresponding to (233) plane, which are calculated from single crystal structure data of HMQ-TMS crystals in Ref. 11.
